# Supplementary material for: Transcriptional Profiling Reveals Adaptive Response and Tolerance to Lactic Acid Stress in Pichia kudriavzevii
Source: MDPI journal article supplement (doi:10.3390/foods11182725), 2022-09-06
Supplement: s1 [file s1]

## Supplementary Materials

# Transcriptional Profiling Reveals Adaptive Response and Tolerance to Lactic Acid Stress in *Pichia kudriavzevii*

Hai Du <sup>†</sup>, Yan Fu <sup>†</sup>, Nan Deng and Yan Xu <sup>\*</sup>

Laboratory of Brewing Microbiology and Applied Enzymology, Key Laboratory of Industrial Biotechnology of Ministry of Education, School of Biotechnology, Jiangnan University, 1800 Lihu Avenue, Wuxi 214122, China

<sup>\*</sup> Correspondence: yxu@jiangnan.edu.cn; Tel.: +86-510-85964112

<sup>†</sup> These authors contributed equally to this work.

## Supplemental Tables

**Table S1.** Fold change in growth and metabolism of *P. kudriavzevii* C-16 and its type strain ATCC 24210 under different concentrations of lactic acid stress.

| Concentration<br>of lactic acid<br>(g L <sup>-1</sup> ) | OD <sub>600</sub> of the<br>end of<br>fermentation | Specific<br>growth<br>rate | Consumption<br>of lactic acid | Consumption<br>rate of lactic<br>acid (12 h) | Consumption<br>rate of lactic<br>acid (24 h) |
|---------------------------------------------------------|----------------------------------------------------|----------------------------|-------------------------------|----------------------------------------------|----------------------------------------------|
| 20                                                      | 1.14                                               | 1.06                       | 1.37                          | 1.24                                         | 2.36                                         |
| 30                                                      | 1.20                                               | 1.09                       | 2.83                          | 2.70                                         | 2.55                                         |
| 40                                                      | 1.16                                               | 1.05                       | 2.04                          | 1.57                                         | 2.93                                         |

Note: Fold change is the ratio of *P. kudriavzevii* C-16 to the type strain ATCC 24210.

**Table S2.** Genome comparison between reads and reference sequence.

| Sample                                                 | clean reads<br>(million) | Total mapped<br>reads (%) | Multiple mapped<br>reads (%) | Uniquely mapped<br>reads (%) |
|--------------------------------------------------------|--------------------------|---------------------------|------------------------------|------------------------------|
| <i>P. kudriavzevii</i> C-16<br>cultured for 12 h       | 48.27                    | 97.06                     | 1.82                         | 95.24                        |
| <i>P. kudriavzevii</i> C-16<br>cultured for 24 h       | 56.87                    | 97.19                     | 2.27                         | 94.93                        |
| <i>P. kudriavzevii</i> ATCC<br>24210 cultured for 12 h | 49.86                    | 96.89                     | 2.25                         | 94.64                        |
| <i>P. kudriavzevii</i> ATCC<br>24210 cultured for 24 h | 46.29                    | 96.85                     | 1.95                         | 94.90                        |

**Table S3.** Differently expressed genes related to pyruvate metabolism.

| Gene        | Function                                            | Fold change<br>(12 h) | Fold change<br>(24 h) |
|-------------|-----------------------------------------------------|-----------------------|-----------------------|
| <i>lldD</i> | L-lactate dehydrogenase (cytochrome)                | 6.13                  | 11.02                 |
| <i>LEU4</i> | 2-Isopropylmalate synthase                          | 2.60                  | 3.01                  |
| <i>MAE1</i> | Malate dehydrogenase (oxaloacetate-decarboxylating) | 2.33                  | 1.08                  |
| <i>PCK1</i> | Phosphoenolpyruvate carboxykinase (ATP)             | 2.64                  | 1.60                  |
| <i>ACSI</i> | Acetyl-CoA synthetase                               | 1.32                  | 1.89                  |

Note: Fold change is the ratio of *P. kudriavzevii* C-16 to the type strain ATCC 24210.

**Table S4.** Fold change of transcription of the gene *SNQ2*.

| Gene ID       | Function                                     | Fold change<br>(12 h) | Fold change<br>(24 h) |
|---------------|----------------------------------------------|-----------------------|-----------------------|
| C5L36_0C11740 |                                              | 31.13                 | 54.80                 |
| C5L36_0B06280 | ATP-binding cassette transporter <i>SNQ2</i> | 3.95                  | 4.09                  |
| C5L36_0B12900 |                                              | 1.27                  | 1.90                  |

Note: Fold change is the ratio of *P. kudriavzevii* C-16 to the type strain ATCC 24210.

**Table S5.** Differently expressed genes related to glutamate metabolic.

| Gene        | Function                             | Fold change<br>(12 h) | Fold change<br>(24 h) |
|-------------|--------------------------------------|-----------------------|-----------------------|
| <i>GAD1</i> | glutamate decarboxylase              | 2.45                  | 1.74                  |
| <i>UGA2</i> | succinate-semialdehyde dehydrogenase | 2.23                  | 1.75                  |

Note: Fold change is the ratio of *P. kudriavzevii* C-16 to the type strain ATCC 24210.

**Table S6.** Differently expressed genes related to biosynthesis of amino acids.

| Gene        | Function                        | Fold change<br>(12 h) | Fold change<br>(24 h) |
|-------------|---------------------------------|-----------------------|-----------------------|
| <i>LEU2</i> | 3-isopropylmalate dehydrogenase | 2.09                  | 1.81                  |
| <i>ILV5</i> | ketol-acid reductoisomerase     | 2.66                  | 1.97                  |
| <i>LEU4</i> | 2-isopropylmalate synthase      | 2.60                  | 3.01                  |
| <i>LEU1</i> | 3-isopropylmalate dehydratase   | 4.49                  | 4.43                  |

Note: Fold change is the ratio of *P. kudriavzevii* C-16 to the type strain ATCC 24210.

## Supplemental Figures

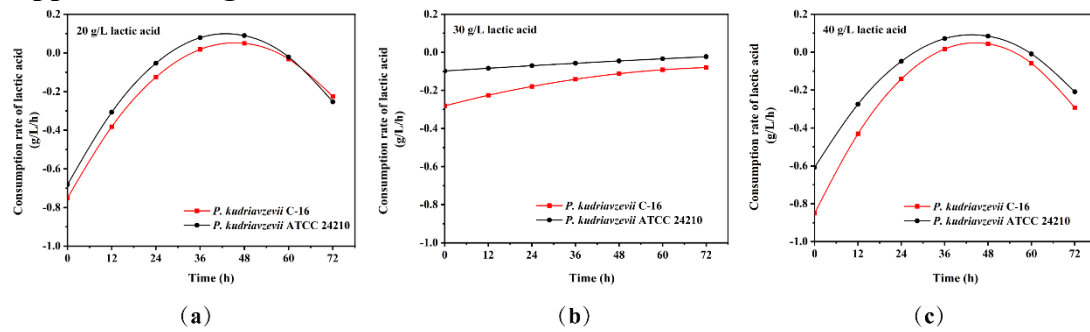

**Figure S1.** Lactic acid consumption rate of *P. kudriavzevii* C-16 and the type strain ATCC 24210 under different concentrations of lactic acid stress. (a) Under 20 g/L lactic acid stress; (b) under 30 g/L lactic acid stress; (c) under 40 g/L lactic acid stress. The initial pH of the culture medium was adjusted to 3.5.

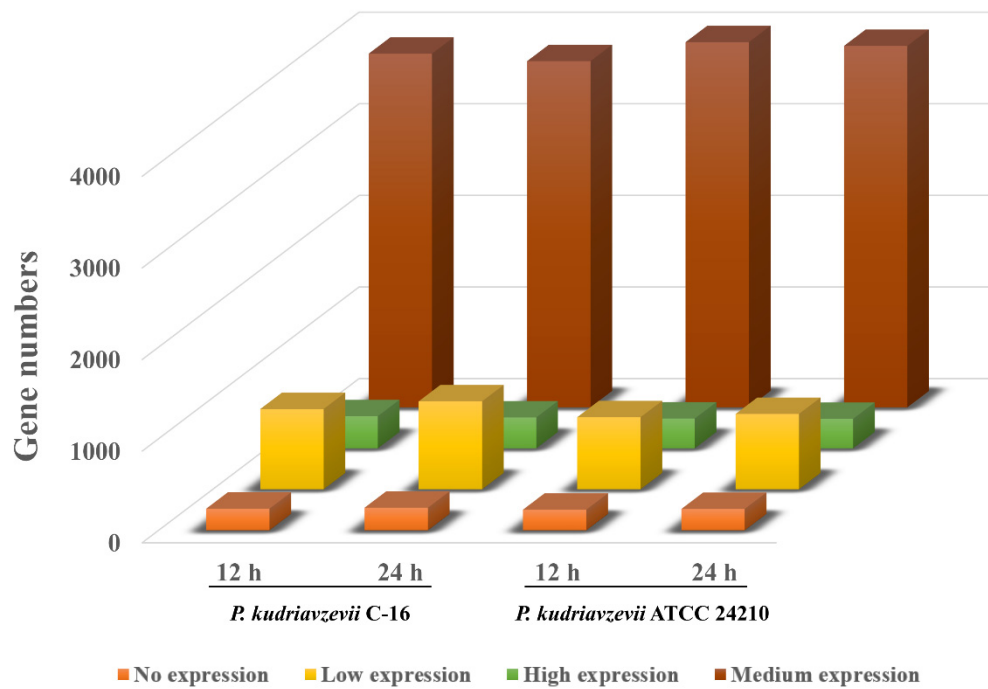

**Figure S2.** The abundance of the gene expression of *P. kudriavzevii* C-16 and its type strain ATCC 24210 throughout the cultivation period. The transcripts were assessed based on FPKM values: high expression ( $\text{FPKM} \geq 500$ ), medium expression ( $15 \leq \text{FPKM} < 500$ ), low expression ( $1 \leq \text{FPKM} < 15$ ), and no expression ( $0 \leq \text{FPKM} < 1$ ).
